# Supplementary material for: The interplay between ADHD and school shift on educational outcomes in children and adolescents: A cross-sectional and longitudinal analysis
Source: Research Square preprint supplement (doi:10.21203/rs.3.rs-4364073/v1), 2024-05-13
Supplement: Supplementary file 1 [file 0ff7c14c1143e9ca72ddf916.docx]

| **Table 2** Baseline and follow-up outcome description based on school shift and ADHD diagnosis. | | | | | | |
| --- | --- | --- | --- | --- | --- | --- |
|  | Afternoon shift | | | Morning/full day shift | | |
| *Dependent variables at baseline (n - 2240)* | No ADHD (n = 982) | ADHD (n = 134) | p-value | No ADHD (n = 1008) | ADHD (n = 116) | p-value |
| Reading ability z-score (mean, SD)1 | -0.45 (0.82) | -0.77 (0.87) | <0.001 | -0.49 (0.90) | -0.82 (0.97) | 0.001 |
| Writing ability z-score (mean, SD)1 | -0.40 (0.80) | -0.73 (0.86) | <0.001 | -0.45 (0.88) | -0.76 (0.92) | 0.001 |
| Performance in school subjects z-score (mean, SD)1 | 0.04 (0.87) | -0.53 (0.96) | <0.001 | 0.08 (0.87) | -0.70 (1.05) | <0.001 |
| Grade repetition2 | 166 (17%) | 40 (30%) | <0.001 | 205 (20%) | 33 (28%) | 0.058 |
| School suspension2 | 28 (2.9%) | 9 (6.7%) | 0.037 | 54 (5.4%) | 12 (10%) | 0.051 |
| School dropout/expulsion2 | 21 (2.1%) | 5 (3.7%) | 0.405 | 21 (2.1%) | 1 (0.9%) | 0.586 |
| *Dependent variables at 3-year follow-up (n = 1826)* | No ADHD (n = 856) | ADHD (n = 52) | p-value | No ADHD (n = 877) | ADHD (n = 41) | p-value |
| Reading ability z-score (mean, SD)1 | 0.05 (0.60) | -0.22 (0.57) | 0.003 | 0.05 (0.63) | -0.21 (0.57) | 0.012 |
| Writing ability z-score (mean, SD)1 | 0.09 (0.58) | -0.20 (0.51) | <0.001 | 0.09 (0.62) | -0.21 (0.59) | 0.006 |
| Performance in school subjects z-score (mean, SD)1 | 0.06 (0.90) | -0.64 (1.08) | <0.001 | -0.01 (0.91) | -0.75 (1.11) | <0.001 |
| Grade repetition2 | 232 (27%) | 26 (50%) | <0.001 | 241 (28%) | 17 (41%) | 0.078 |
| School suspension2 | 62 (7.2%) | 11 (21%) | <0.001 | 83 (9.5%) | 10 (24%) | 0.005 |
| School dropout/expulsion2 | 40 (4.7%) | 6 (12%) | 0.062 | 54 (6.2%) | 7 (17%) | 0.016 |
| **Note**: SD, standard deviation; ¹ Welch Two Sample t-test; 2 Pearson’s Chi-squared test. | | | | | | |
