# Supplementary material for: The interplay between ADHD and school shift on educational outcomes in children and adolescents: A cross-sectional and longitudinal analysis
Source: Research Square preprint supplement (doi:10.21203/rs.3.rs-4364073/v1), 2024-05-13
Supplement: Supplementary file 2 [file 14387cc3a8cfa2836babff03.docx]

| **Table 1** Baseline sample characteristics by school shift | | |  |
| --- | --- | --- | --- |
| *Independent variables at baseline*  *(n = 2.240)* | Afternoon shift  (n = 1.116) | Morning/full day shift  (n = 1.124) | P-value |
| ADHD | 134 (12%) | 116 (10.3%) | 0.230 |
| Age | 10.1 (1.78) | 10.3 (2.02) | <0.001 |
| Gender (female) | 497 (44.5%) | 524 (46.6%) | 0.343 |
| Child race/ethnicity |  |  | 0.311 |
| White | 695 (63.3%) | 659 (58.6%) |  |
| Asian | 3 (0.3%) | 2 (0.2%) |  |
| Black | 118 (10.6%) | 117 (10.4%) |  |
| Mixed | 291 (26.1%) | 339 (30.2%) |  |
| Native | 5 (0.4%) | 5 (0.4%) |  |
| IQ z-score (mean, SD) | -0.0179 (1.00) | 0.0186 (0.997) | 0.388 |
| Educational level (primary education) |  |  | <0.001 |
| 1st year | 42 (3.8%) | 56 (5.0%) |  |
| 2nd year | 159 (14.2%) | 144 (12.8%) |  |
| 3rd year | 226 (20.3%) | 184 (16.4%) |  |
| 4th year | 247 (22.1%) | 212 (18.9%) |  |
| 5th year | 253 (23.7%) | 230 (20.5%) |  |
| 6th year | 128 (11.5%) | 119 (10.6%) |  |
| 7th year | 47 (4.2%) | 110 (9.8%) |  |
| 8th year | 13 (1.2%) | 62 (5.5%) |  |
| 9th year | 1 (0.1%) | 6 (0.5%) |  |
| Parental educational level |  |  | 0.968 |
| Without Study | 8 (0.7%) | 8 (0.7%) |  |
| Elementary school incomplete | 200 (17.9%) | 183 (16.3%) |  |
| Elementary school completed | 171 (15.3%) | 173 (15.4%) |  |
| Incomplete high school | 183 (16.4%) | 181 (16.1%) |  |
| High School | 424 (38%) | 435 (38.7%) |  |
| Incomplete higher education | 73 (6.5%) | 81 (7.2%) |  |
| Higher education | 47 (4.2%) | 54 (4.8%) |  |
| Higher education with postgraduate studies | 10 (0.9%) | 9 (0.8%) |  |
| Social class |  |  | 0.622 |
| A/B | 178 (15.9%) | 196 (17.4%) |  |
| C | 806 (72.2%) | 801 (71.3%) |  |
| D/E | 132 (11.8%) | 127 (11.3%) |  |
| Site |  |  | < 0.001 |
| São Paulo | 465 (41.7%) | 646 (57.5%) |  |
| Porto Alegre | 651 (58.3%) | 478 (42.5%) |  |
| Lifetime use of ADHD medication | 15 (1.3%) | 20 (1.8%) | 0.509 |
| Current use of ADHD medication | 10 (0.9%) | 14 (1.2%) | 0.550 |
| SDQ hyperactivity z-score (mean, SD) | 0.0466 (0.825) | -0.0342 (0.859) | 0.023 |
| CBCL attention/hyperactivity z-score (mean, SD) | 0.0651 (0.857) | 0.00412 (0.892) | 0.099 |
| **Note**: ADHD, attention-deficit and hyperactivity disorder; SDQ, Strengths and Difficulties Questionnaire; CBCL, Child Behavior Checklist. SD, standard deviation. | | |  |
