# Supplementary material for: The interplay between ADHD and school shift on educational outcomes in children and adolescents: A cross-sectional and longitudinal analysis
Source: Research Square preprint supplement (doi:10.21203/rs.3.rs-4364073/v1), 2024-05-13
Supplement: Supplementary file 3 [file 30f26235605768935539525f.docx]

| **Table 3.** Adjusted cross-sectional and longitudinal associations of educational outcomes with ADHD and school shift. | | | | |
| --- | --- | --- | --- | --- |
|  | Reading ability (z-score) | Writing ability (z-score) | Performance in school subjects (z-score) | Negative school events |
| *Cross-sectional associations* | β (95%CI) | β (95%CI) | β (95%CI) | OR (95%CI) |
| ADHD (ref: no ADHD) | -0.21 ** (-0.35 – -0.07) | -0.22 ** (-0.36 – -0.08) | -0.49 *** (-0.66 – -0.32) | 2.42 *** (1.64 – 3.54) |
| School shift (ref: afternoon) | -0.13 *** (-0.19 – -0.07) | -0.16 *** (-0.22 – -0.10) | 0.03 (-0.04 – 0.11) | 1.66 *** (1.38 – 2.01) |
| ADHD*School shift | -0.02 (-0.22 – 0.18) | 0.02 (-0.18 – 0.21) | -0.33 ** (-0.58 – -0.09) | 0.56 * (0.31 – 0.98) |
| R2 / R2 adjusted | 0.429 / 0.425 | 0.440 / 0.436 | 0.117 / 0.112 | 0.364 |
| *Longitudinal associations* | β (95%CI) | β (95%CI) | β (95%CI) | OR (95%CI) |
| ADHD (ref: no ADHD) | -0.08 (-0.20 – 0.03) | -0.06 (-0.17 – 0.06) | -0.36 *** (-0.56 – -0.16) | 2.81 *** (1.99 – 3.98) |
| School shift (ref: afternoon) | 0.03 (-0.02 – 0.08) | 0.04 (-0.01 – 0.08) | -0.06 (-0.15 – 0.02) | 1.16 (0.99 – 1.37) |
| ADHD*School shift | -0.07 (-0.23 – 0.10) | -0.14 (-0.30 – 0.01) | -0.11 (-0.39 – 0.17) | 1.22 (0.74 – 1.99) |
| R2 / R2 adjusted | 0.454 / 0.448 | 0.456 / 0.450 | 0.134 / 0.127 | 0.183 |
| Note: Analysis were adjusted for age, family socioeconomic group, participant's race/ethnicity and educational level, parental highest education level and study site. All analysis were weighted for attrition and oversampling procedure. ADHD, attention-deficit and hyperactivity disorder. * p<0.05 ** p<0.01 *** p<0.001. | | | | |
